# Supplementary material for: Co-electrolysis of H2O and CO2in a solid oxide electrolysis cell with hierarchically structured porous electrodes
Source: Royal Society of Chemistry journal article supplement (doi:10.1039/c5ta03264d), 2015-01-01
Supplement: c5ta03264d1.pdf [file c5ta03264d1.pdf]

## Supplementary Information

### Co-electrolysis of H<sub>2</sub>O and CO<sub>2</sub> in a solid oxide electrolysis cell with hierarchically structured porous electrodes

Chenghao Yang,<sup>a</sup> Jiao Li<sup>a</sup>, James Newkirk<sup>b</sup>, Valerie Baish<sup>b</sup>, Renzong Hu<sup>c</sup>, Yu Chen<sup>d</sup>  
and Fanglin Chen<sup>d</sup>

<sup>a</sup> New Energy Research Institute, School of Environment and Energy, South China  
University of Technology, Guangzhou Higher Education Mega Center, Guangzhou,  
Guangdong 510006, China

<sup>b</sup> ENrG Inc. 155 Rano Street, Suite 300, Buffalo, NY 14207, USA

<sup>c</sup> School of Materials Science and Engineering, South China University of  
Technology, Guangzhou 510640, PR China

<sup>d</sup> Department of Mechanical Engineering, University of South Carolina, 300 Main  
Street, Columbia, SC 29208, USA

Email: esyangc@scut.edu.cn

## 1. SOEC single cell fabricated by dry-pressing and screening-printing method

The traditional button cell with Ni-YSZ hydrogen electrode, YSZ electrolyte and LSM-YSZ oxygen electrode fabricated by dry-pressing, dip-coating and screen printing method, respectively, has also been studied for H<sub>2</sub>O electrolysis and H<sub>2</sub>O-CO<sub>2</sub> co-electrolysis (Fig. S1) [10]. Three different gas compositions were used as feeding gas, e.g. 30 vol.% H<sub>2</sub>-70 vol.% H<sub>2</sub>O, 50 vol.% H<sub>2</sub>-50 vol.% H<sub>2</sub>O, 25 vol.% H<sub>2</sub>-50 vol.% H<sub>2</sub>O-25 vol.% CO<sub>2</sub> (Fig. S2). When 50 vol.% H<sub>2</sub>O-50 vol.% H<sub>2</sub> was used as feeding gas, the voltage of the cell fabricated by the traditional method was only 0.30 A cm<sup>-2</sup> (Fig. S2).

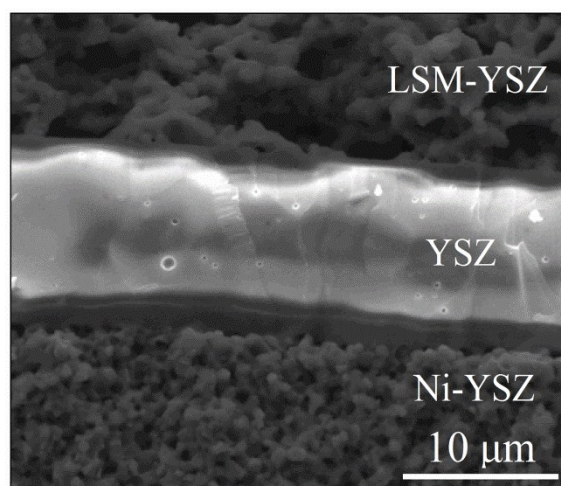

Fig. S1. Cross sectional SEM micrographs of LSM-YSZ/YSZ/Ni-YSZ single cell fabricated by traditional dry-pressing and screening-printing method.

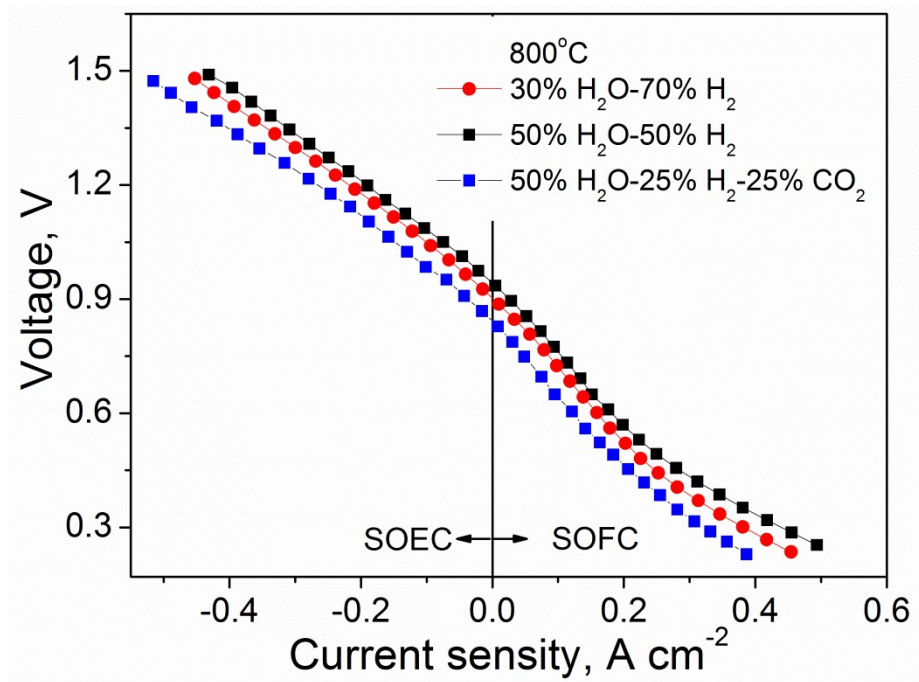

Fig. S2. DC potential-current density curves of LSM-YSZ/YSZ/Ni-YSZ cell operated in 50 vol.%  $\text{H}_2\text{O}$ -50 vol.%  $\text{H}_2$  at 800°C.

## 2. SOEC single cell fabricated by dry-pressing and infiltration method

The button cell with Ni-SDC-YSZ hydrogen electrode, YSZ electrolyte and LSM-YSZ oxygen electrode fabricated by dry-pressing, dip-coating and infiltration method, respectively, has also been studied for H<sub>2</sub>O electrolysis and H<sub>2</sub>O-CO<sub>2</sub> co-electrolysis (Fig. S3) [12]. Three different gas compositions were used as feeding gas, e.g. 30 vol.% H<sub>2</sub>-70 vol.% H<sub>2</sub>O, 50 vol.% H<sub>2</sub>-50 vol.% H<sub>2</sub>O, 25 vol.% H<sub>2</sub>-50 vol.% H<sub>2</sub>O-25 vol.% CO<sub>2</sub> (Fig. S4). When 50 vol.% H<sub>2</sub>O-50 vol.% H<sub>2</sub> was used as feeding gas, the cell performance was greatly enhanced, and a high current density of 0.51 A cm<sup>-2</sup> was obtained under 1.3 applied voltage in 50 vol.% H<sub>2</sub>O-50 vol.% H<sub>2</sub> (Fig. S4).

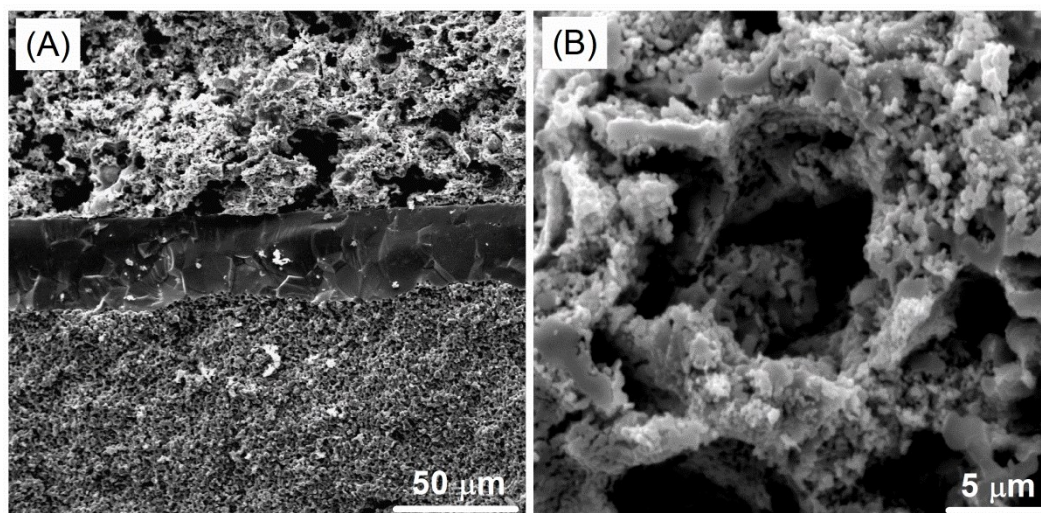

Fig. S3. (A) Cross-sectional SEM image of Ni-SDC-YSZ/YSZ/LSM-SDC-YSZ SOEC after electrolysis test, and (B) SEM images of LSM-SDC infiltrated LSM-SDC-YSZ oxygen electrode after electrolysis test.

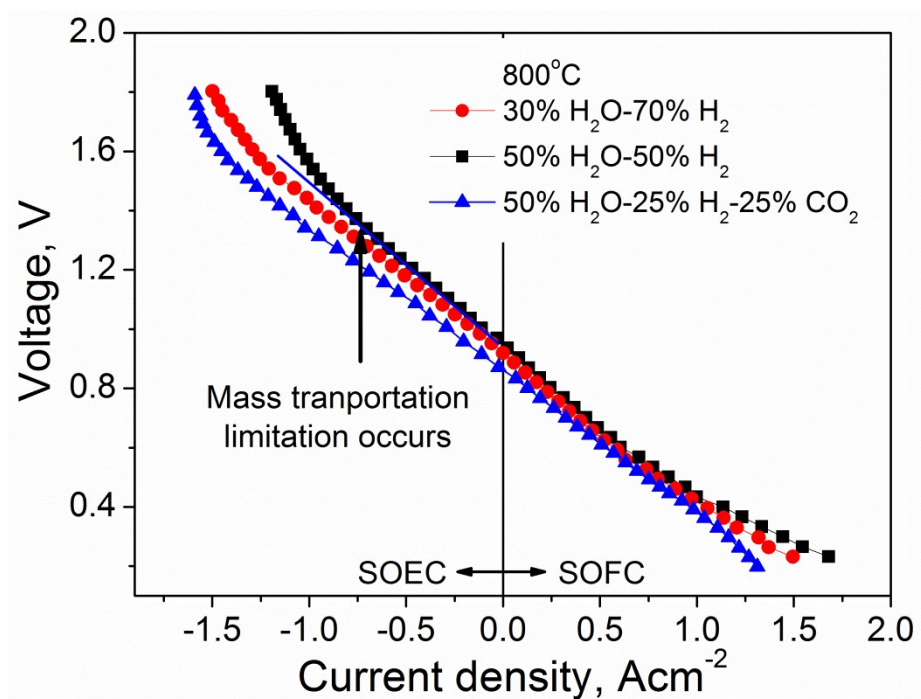

Fig. S4. DC potential-current density curves of Ni-SDC-YSZ/YSZ/LSM-SDC-YSZ single cells fabricated by dry-pressing and infiltration method operated in 50 vol.% H<sub>2</sub>O-50 vol.% H<sub>2</sub> at 800°C.

### 3. Micro-tubular SOEC single cell fabricated by phase-inversion and infiltration method

The micro-tubular single cell with Ni-SDC-YSZ hydrogen electrode, YSZ electrolyte and LSM-SDC-YSZ oxygen electrode fabricated by phase-inversion, dip-coating and infiltration method, respectively, has also been studied for H<sub>2</sub>O electrolysis and H<sub>2</sub>O-CO<sub>2</sub> co-electrolysis (Fig. S5) [13]. Three different gas compositions were used as feeding gas, e.g. 30 vol.% H<sub>2</sub>-70 vol.% H<sub>2</sub>O, 50 vol.% H<sub>2</sub>-50 vol.% H<sub>2</sub>O, 25 vol.% H<sub>2</sub>-50 vol.% H<sub>2</sub>O-25 vol.% CO<sub>2</sub> (Fig. S6). When 50 vol.% H<sub>2</sub>O-50 vol.% H<sub>2</sub> was used as feeding gas, the cell performance was greatly enhanced, and a high current density of 0.51 A cm<sup>-2</sup> was obtained under 1.3 applied voltage in 50 vol.% H<sub>2</sub>O-50 vol.% H<sub>2</sub> (Fig. S4).

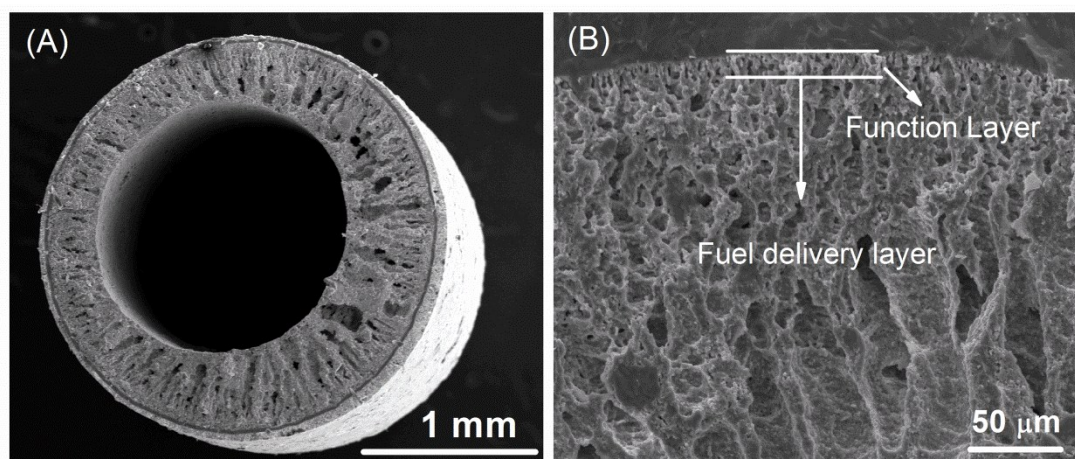

Fig. S5. (A) Overall view of the hydrogen electrode-supported Micro-tubular SOEC, (B) cross-sectional fracture surface micrograph of the hydrogen electrode-supported MT-SOC, indicating the microstructure of the hydrogen electrode fuel delivery layer and function layer.

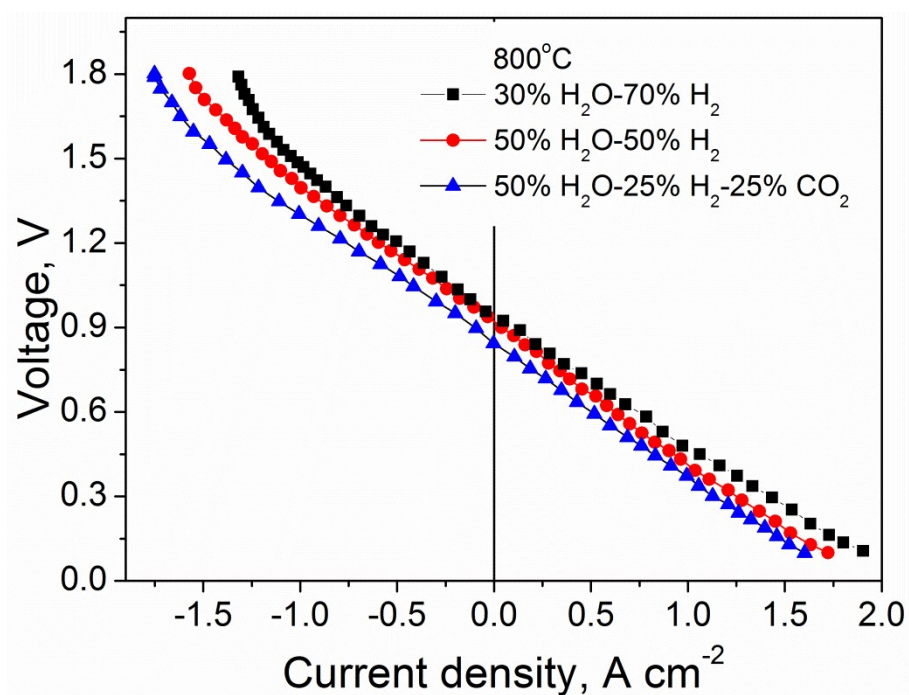

Fig. S6. DC potential-current density curves of Ni-SDC-YSZ/YSZ/LSM-SDC-YSZ single cells fabricated by phase-inversion and infiltration method operated in 50 vol.% H<sub>2</sub>O-50 vol.% H<sub>2</sub> and 80 vol.% H<sub>2</sub>O-20 vol.% H<sub>2</sub> at 900°C, respectively.

#### 4. SOEC single cell fabricated by freeze-drying tape-casting and infiltration method

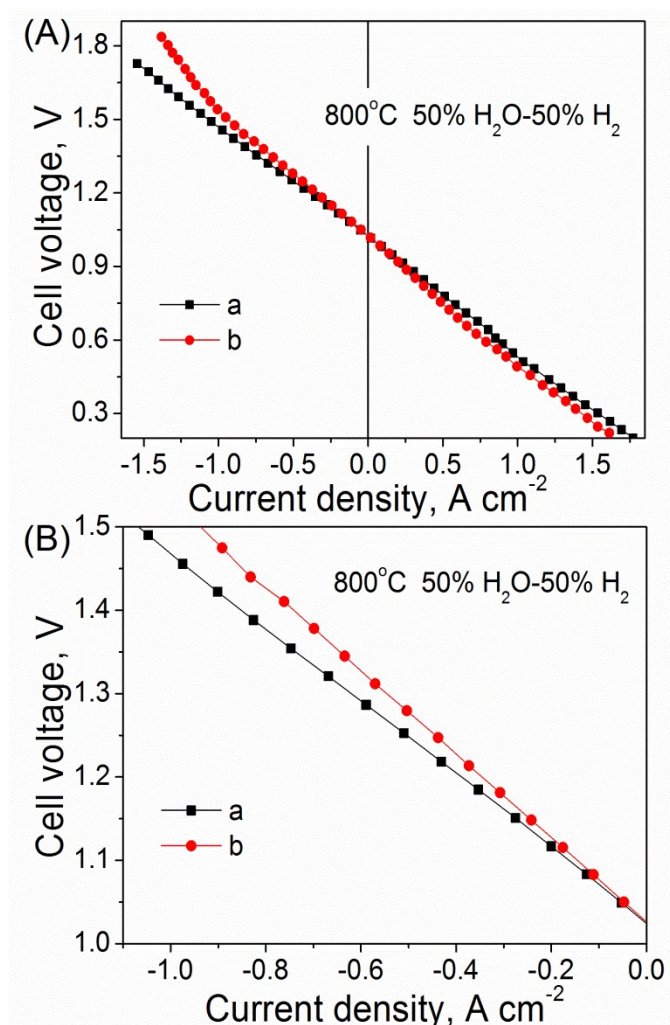

Fig. S7. DC potential-current density curves of Ni-SDC-YSZ/YSZ/LSM-SDC-YSZ single cells in fuel cell mode and co-electrolysis mode (A) or in co-electrolysis mode (from open circuit voltage (OCV) to 1.5 V) (B), fabricated by freeze-drying tape-casting and infiltration method (a) or traditional dry-pressing and infiltration method (b) in 50 vol.% H<sub>2</sub>O-50 vol.% H<sub>2</sub> at 800°C, respectively.

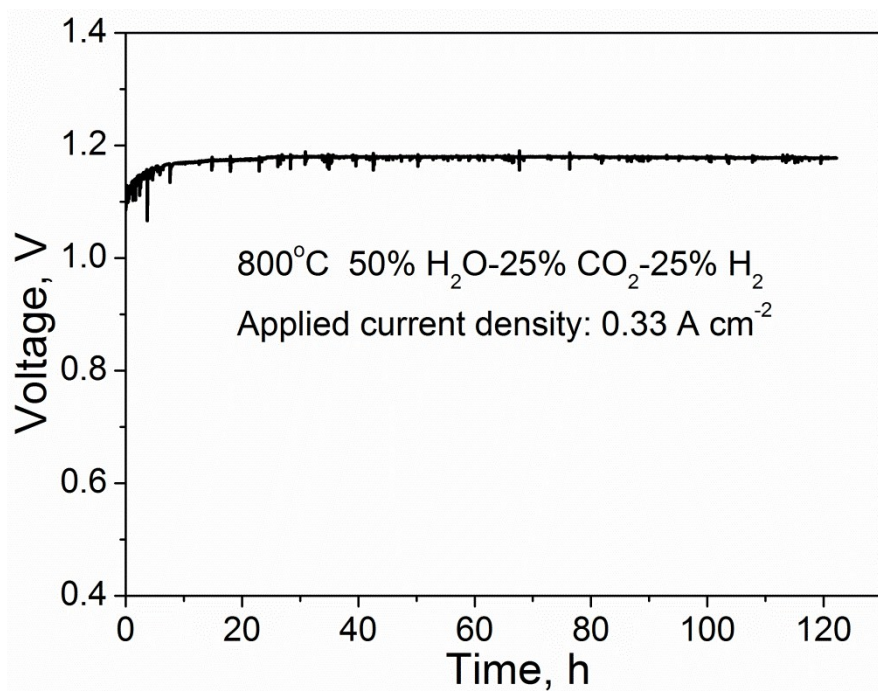

Fig. S8. A 0.33 A cm<sup>-2</sup> constant current co-electrolysis testing of Ni-SDC-YSZ/YSZ/LSM-SDC-YSZ cell fabricated by Freeze-drying Tape-casting and infiltration method in 50 vol.% H<sub>2</sub>O-25 vol.% CO<sub>2</sub>-25 vol.% H<sub>2</sub> at 800°C.
